# Supplementary material
Source: Springer Nature journal article supplement (https://www.springermedizin.de/resource/supplementary/12887_2012_748_MOESM1_ESM.pdf/9475476)

**A.**

Preterm infants

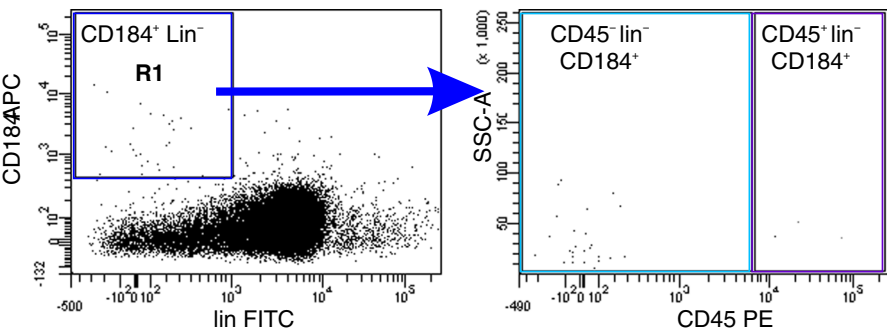

Full-term infants

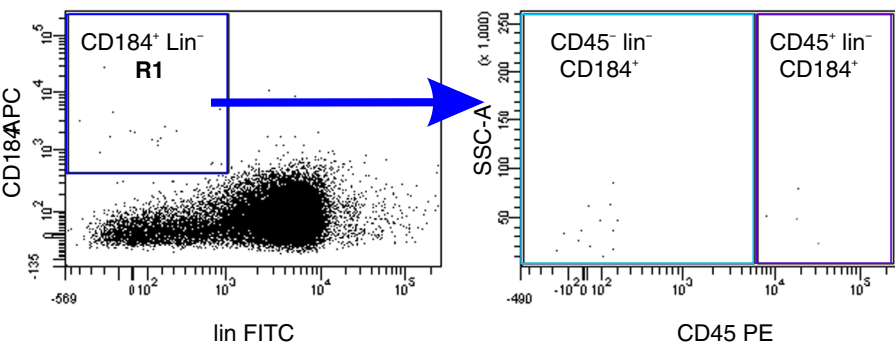**B.**

Preterm infants

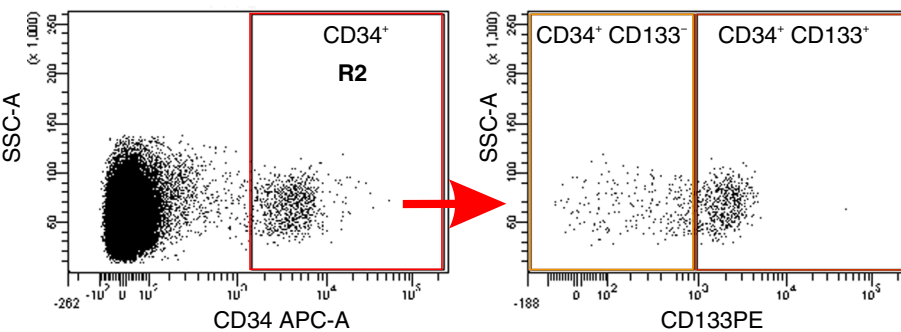

Full-term infants

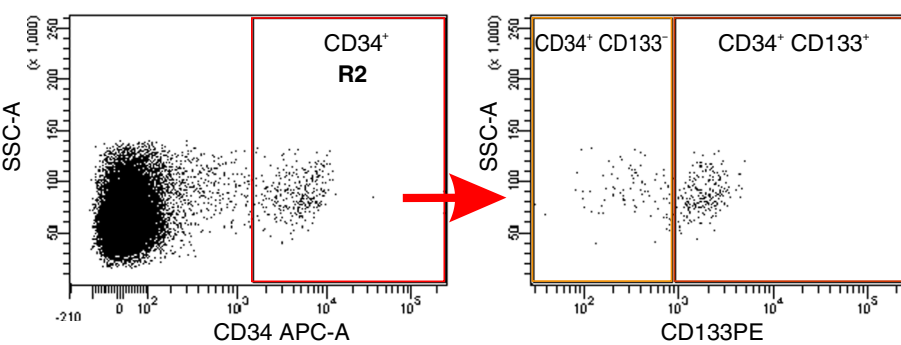

Supplement: MOESM1 [file 9475476]
